# Supplementary material for: Global prevalence of cardiopulmonary resuscitation training among the general public: a scoping review
Source: PubMed Central journal article supplement — Clin Exp Emerg Med. 2021 Dec 31;8(4):255–67. doi: 10.15441/ceem.21.066 (PMC8743682; doi:10.15441/ceem.21.066), 2021-12-31
Supplement: ceem-21-066-suppl1.pdf [file ceem-21-066-suppl1.pdf]

**Supplementary Table 1.** Search strategy (Medline)

- 
01. basic life support[Title/Abstract]
  02. BLS[Title/Abstract]
  03. cardiopulmonary resuscitation[Title/Abstract]
  04. CPR[Title/Abstract]
  05. first aid[Title/Abstract]
  06. resuscitation[Title/Abstract]
  07. *1 or 2 or 3 or 4 or 5 or 6*
  08. attitude\*[Title/Abstract]
  09. educat\*[Title/Abstract]
  10. knowledge[Title/Abstract]
  11. learn\*[Title/Abstract]
  12. teach\*[Title/Abstract]
  13. train\*[Title/Abstract]
  14. *8 or 9 or 10 or 11 or 12 or 13*
  15. citizen\*[Title/Abstract]
  16. community[Title/Abstract]
  17. lay person\*[Title/Abstract]
  18. laypeople[Title/Abstract]
  19. layperson\*[Title/Abstract]
  20. population\*[Title/Abstract]
  21. public[Title/Abstract]
  22. resident\*[Title/Abstract]
  23. *15 or 16 or 17 or 18 or 19 or 20 or 21 or 22*
  24. survey\*[Title/Abstract]
  25. interview\*[Title/Abstract]
  26. questionnaire\*[Title/Abstract]
  27. *24 or 25 or 26*
  28. *"2000/01/01"[Date - Publication] : "3000"[Date - Publication]*
  29. *7 and 14 and 23 and 27 and 28*
- 

BLS, basic life support; CPR, cardiopulmonary resuscitation.
