# Supplementary material for: Global prevalence of cardiopulmonary resuscitation training among the general public: a scoping review
Source: PubMed Central journal article supplement — Clin Exp Emerg Med. 2021 Dec 31;8(4):255–67. doi: 10.15441/ceem.21.066 (PMC8743682; doi:10.15441/ceem.21.066), 2021-12-31
Supplement: ceem-21-066-suppl2.pdf [file ceem-21-066-suppl2.pdf]

**Supplementary Table 2.** Characteristics of studies included in the review (n=61)

| Country [Reference(s)]                                                       | Year(s) of survey | Method of gathering survey data                          | Target population                                                | Range of study                                                      | Number of respondents                                              | Age of respondents (yr) | Sampling method                                    | Justified sample size | Response rate (%) | Ever trained in CPR (%)                                   | Trained in CPR within previous 1 year (%) <sup>1</sup> | Trained in CPR within previous 2 years (%) <sup>1</sup> | Trained in CPR within previous 5 years (%) <sup>1</sup> | Trained in CPR over 5 years ago (%) <sup>1</sup> | Willing to be trained in CPR (%) |
|------------------------------------------------------------------------------|-------------------|----------------------------------------------------------|------------------------------------------------------------------|---------------------------------------------------------------------|--------------------------------------------------------------------|-------------------------|----------------------------------------------------|-----------------------|-------------------|-----------------------------------------------------------|--------------------------------------------------------|---------------------------------------------------------|---------------------------------------------------------|--------------------------------------------------|----------------------------------|
| Australia [Clark et al., 2002; Johnston et al., 2003; Johnston et al., 2004] | 1998              | Telephone survey                                         | General public                                                   | State (Queensland)                                                  | 4,490                                                              | ≥ 18                    | Stratified random sample                           | No                    | 72                | 54                                                        | 22                                                     | -                                                       | -                                                       | -                                                | -                                |
| Australia [Jelinek et al., 2001; Celenza et al., 2002]                       | 1999              | Telephone survey                                         | General public                                                   | State (Western Australia)                                           | 803                                                                | Adults                  | Stratified random sample                           | No                    | 55                | 64                                                        | 20                                                     | -                                                       | 58                                                      | 42                                               | -                                |
| Australia [Smith et al., 2003]                                               | 2000–2001         | Telephone survey                                         | General public                                                   | State (Victoria)                                                    | 1,489                                                              | Adults                  | Stratified random sample                           | Yes                   | 52                | 52                                                        | 21                                                     | -                                                       | -                                                       | -                                                | -                                |
| Australia [Dwyer, 2008]                                                      | 2005              | Telephone survey                                         | General public                                                   | Region (Central Queensland)                                         | 1,208                                                              | ≥ 18                    | Simple random sample                               | No                    | 39                | 74                                                        | -                                                      | -                                                       | -                                                       | -                                                | -                                |
| Australia [Bray et al., 2016; Bray et al., 2017]                             | 2016              | Telephone survey                                         | General public                                                   | State (Victoria)                                                    | 404                                                                | ≥ 18                    | -                                                  | Yes                   | 45                | 68                                                        | 28                                                     | -                                                       | 47                                                      | 51                                               | -                                |
| Australia [Cartledge et al., 2020]                                           | 2017              | Online survey                                            | General public (interested/registered to participate in surveys) | Country                                                             | 1,076                                                              | ≥ 18                    | Purposive non-probability sample (quota sample)    | No                    | -                 | 56                                                        | 22                                                     | -                                                       | 56                                                      | 42                                               | 73 <sup>2</sup>                  |
| Belgium [Scavee et al., 2011*]                                               | -                 | Questionnaire self-completion (in public places + email) | General public                                                   | Country                                                             | 2,070                                                              | ≥ 16                    | Non-probability sample (convenience sample)        | No                    | -                 | 30                                                        | -                                                      | -                                                       | -                                                       | -                                                | -                                |
| Brazil [Bartlett et al., 2020]                                               | 2017–2019         | Face-to-face interview (household survey)                | General public                                                   | Three municipalities (Padre Paraíso, Poçoões, Vitória da Conquista) | 962 (Padre Paraíso), 1,019 (Poçoões), 1,054 (Vitória da Conquista) | ≥ 30                    | Systematic random sample                           | Yes                   | -                 | 3 (Padre Paraíso), 6 (Poçoões), 16 (Vitória da Conquista) | -                                                      | -                                                       | -                                                       | -                                                | -                                |
| Canada [Cheskes et al., 2016]                                                | -                 | Online survey                                            | General public (interested/registered to participate in surveys) | Country                                                             | 428                                                                | ≥ 18                    | Non-probability sample (voluntary response sample) | Yes                   | -                 | 64                                                        | -                                                      | -                                                       | -                                                       | -                                                | -                                |
| China [Cheung et al., 2003]                                                  | 2002              | Telephone survey                                         | General public                                                   | Region (Hong Kong)                                                  | 357                                                                | ≥ 16                    | Simple random sample                               | Yes                   | 45                | 12                                                        | 19                                                     | 36                                                      | 48                                                      | 52                                               | -                                |

(continued to the next page)

Supplementary Table 2. Continued

| Country [Reference(s)]                                    | Year(s) of survey | Method of gathering survey data                     | Target population                                                                                   | Range of study                          | Number of respondents             | Age of respondents (yr) | Sampling method                             | Justified sample size | Response rate (%) | Ever trained in CPR (%)     | Trained in CPR within previous 1 year (%) <sup>1</sup> | Trained in CPR within previous 2 years (%) <sup>1</sup> | Trained in CPR within previous 5 years (%) <sup>1</sup> | Trained in CPR over 5 years ago (%) <sup>1</sup> | Willing to be trained in CPR (%) |
|-----------------------------------------------------------|-------------------|-----------------------------------------------------|-----------------------------------------------------------------------------------------------------|-----------------------------------------|-----------------------------------|-------------------------|---------------------------------------------|-----------------------|-------------------|-----------------------------|--------------------------------------------------------|---------------------------------------------------------|---------------------------------------------------------|--------------------------------------------------|----------------------------------|
| China [Hung et al., 2011*;<br>Chair et al., 2014]         | 2010              | Telephone survey                                    | General public                                                                                      | Region (Hong Kong)                      | 1,013                             | 15–64                   | Simple random sample                        | Yes                   | 46                | 21                          | -                                                      | -                                                       | -                                                       | 51                                               | -                                |
| China [Chen et al., 2017]                                 | 2014              | Online survey                                       | General public (interested/registered to participate in surveys; excluding medical-related persons) | Country                                 | 1,841                             | No limit                | Simple random sample                        | No                    | -                 | 26                          | -                                                      | -                                                       | -                                                       | -                                                | -                                |
| China [Duber et al., 2018]                                | 2015              | Face-to-face interview (household survey)           | General public                                                                                      | Metropolitan cities (Beijing, Shanghai) | 1,524 (Beijing), 1,537 (Shanghai) | ≥ 18                    | Stratified random sample                    | No                    | -                 | 26 (Beijing), 15 (Shanghai) | -                                                      | -                                                       | -                                                       | -                                                | -                                |
| China [Yan et al., 2020]                                  | 2018–2019         | Questionnaire self-completion                       | General public                                                                                      | Country                                 | 99,186                            | ≥ 18                    | Stratified random sample                    | No                    | 57                | 38                          | -                                                      | -                                                       | -                                                       | -                                                | 733                              |
| China [Liu et al., 2012*]                                 | -                 | Questionnaire completion                            | General public                                                                                      | Metropolitan city (Zhengzhou)           | 338                               | -                       | -                                           | No                    | -                 | 12                          | -                                                      | -                                                       | -                                                       | -                                                | 943                              |
| China [Chan and Chan, 2016*]                              | -                 | Telephone survey                                    | General public                                                                                      | Region (Hong Kong)                      | 524                               | -                       | -                                           | No                    | -                 | 23                          | -                                                      | -                                                       | -                                                       | -                                                | -                                |
| Costa Rica [Schmid et al., 2015*;<br>Schmid et al., 2016] | 2014              | Face-to-face interview (in public gathering places) | General public                                                                                      | Metropolitan city (San José)            | 370                               | -                       | Non-probability sample (convenience sample) | No                    | -                 | 36                          | -                                                      | -                                                       | -                                                       | -                                                | 553                              |
| Ghana [Anto-Ocrah et al., 2020]                           | 2019              | Online survey                                       | General public (social media network users)                                                         | Country                                 | 479                               | ≥ 18                    | Non-probability sample (snowball sample)    | Yes                   | -                 | 31                          | 34                                                     | 51                                                      | 82                                                      | 18                                               | 903                              |
| Greece [Hatzakis et al., 2008]                            | -                 | Telephone survey                                    | General public                                                                                      | County (Heraklion)                      | 390                               | ≥ 18                    | Simple random sample                        | No                    | 81                | 29                          | 30                                                     | -                                                       | 65                                                      | 35                                               | -                                |
| Iceland [Amar et al., 2001*]                              | -                 | Telephone survey                                    | General public                                                                                      | Country                                 | 804                               | 16–75                   | Random sample (type unknown)                | No                    | -                 | 73                          | -                                                      | -                                                       | -                                                       | -                                                | -                                |
| India [Duber et al., 2018]                                | 2015              | Face-to-face interview (household survey)           | General public                                                                                      | Metropolitan city (Bangalore)           | 2,400                             | ≥ 18                    | Stratified random sample                    | No                    | -                 | 3                           | -                                                      | -                                                       | -                                                       | -                                                | -                                |
| Indonesia [Pranata et al., 2020]                          | 2016              | Questionnaire self-completion (in public places)    | General public (excluding persons with medical background)                                          | Metropolitan city (Jakarta)             | 303                               | > 17                    | Non-probability sample (convenience sample) | No                    | 87                | 40                          | -                                                      | -                                                       | -                                                       | -                                                | 743                              |

(continued to the next page)

Supplementary Table 2. Continued

| Country [Reference(s)]                                          | Year(s) of survey | Method of gathering survey data                  | Target population                                                                                                                       | Range of study                | Number of respondents | Age of respondents (yr) | Sampling method                                 | Justified sample size | Response rate (%) | Ever trained in CPR (%) | Trained in CPR within previous 1 year (%) <sup>1</sup> | Trained in CPR within previous 2 years (%) <sup>1</sup> | Trained in CPR within previous 5 years (%) <sup>1</sup> | Trained in CPR over 5 years ago (%) <sup>1</sup> | Willing to be trained in CPR (%) |
|-----------------------------------------------------------------|-------------------|--------------------------------------------------|-----------------------------------------------------------------------------------------------------------------------------------------|-------------------------------|-----------------------|-------------------------|-------------------------------------------------|-----------------------|-------------------|-------------------------|--------------------------------------------------------|---------------------------------------------------------|---------------------------------------------------------|--------------------------------------------------|----------------------------------|
| Ireland [Jennings et al., 2009]                                 | 2008              | Face-to-face interview (in-home)                 | General public                                                                                                                          | Country                       | 974                   | ≥ 16                    | Purposive non-probability sample (quota sample) | Yes                   | -                 | 28                      | -                                                      | 38                                                      | 85                                                      | -                                                | -                                |
| Japan [Kuramoto et al., 2008]                                   | 2006              | Face-to-face interview (in-home)                 | General public                                                                                                                          | Country                       | 1,132                 | 15-79                   | Stratified random sample                        | No                    | 47                | 35                      | -                                                      | -                                                       | -                                                       | -                                                | -                                |
| Japan [Sasaki et al., 2012*; Sasaki et al., 2015]               | 2012              | Online survey                                    | General public (interested/registered to participate in surveys; excluding persons with medical education and healthcare professionals) | Country                       | 4,853                 | ≥ 15                    | Stratified random sample                        | No                    | 58                | 49                      | 11                                                     | -                                                       | 72                                                      | 28                                               | -                                |
| Japan [Otani et al., 2011*]                                     | -                 | Questionnaire self-completion (in public places) | General public                                                                                                                          | Metropolitan city (Hiroshima) | 5,956                 | -                       | Non-probability sample (convenience sample)     | No                    | 60                | 49                      | -                                                      | -                                                       | -                                                       | -                                                | -                                |
| Korea [Lee et al., 2008*]                                       | 2006              | Telephone survey                                 | General public                                                                                                                          | Metropolitan city (Seoul)     | 1,007                 | ≥ 19                    | Random sample (type unknown)                    | No                    | -                 | 45                      | 21                                                     | 30                                                      | -                                                       | -                                                | -                                |
| Korea [Lee et al., 2013; Lee et al., 2016*]                     | 2007              | Telephone survey                                 | General public                                                                                                                          | Country                       | 1,029                 | ≥ 19                    | Stratified random sample                        | No                    | 41                | 48                      | -                                                      | 30                                                      | 40                                                      | 60                                               | 553                              |
| Korea [Lee et al., 2013; Lee et al., 2016*]                     | 2011              | Telephone survey                                 | General public                                                                                                                          | Country                       | 1,000                 | ≥ 19                    | Stratified random sample                        | No                    | 37                | 38                      | -                                                      | 49                                                      | 63                                                      | 37                                               | 593                              |
| Korea [Moon et al., 2017*; Son et al., 2017; Moon et al., 2019] | 2012              | Face-to-face interview (in-home)                 | General public                                                                                                                          | Metropolitan city (Daegu)     | 1,000                 | ≥ 19                    | Probability quota sample                        | No                    | -                 | 36                      | 27                                                     | 47                                                      | 66                                                      | 31                                               | -                                |
| Korea [Ro et al., 2016]                                         | 2012              | Face-to-face interview (in-home)                 | General public                                                                                                                          | Country                       | 228,921               | ≥ 19                    | Stratified random sample                        | No                    | -                 | 27                      | -                                                      | 42                                                      | -                                                       | -                                                | -                                |
| Korea [Lee et al., 2016*]                                       | 2015              | Telephone survey                                 | General public                                                                                                                          | Country                       | 1,000                 | ≥ 19                    | Stratified random sample                        | No                    | -                 | 51                      | -                                                      | 60                                                      | -                                                       | -                                                | 803                              |
| Korea [Moon et al., 2017*; Moon et al., 2019]                   | 2016              | Face-to-face interview (in-home)                 | General public                                                                                                                          | Metropolitan city (Daegu)     | 1,141                 | ≥ 19                    | Probability quota sample                        | No                    | -                 | 55                      | -                                                      | 55                                                      | -                                                       | -                                                | -                                |

(continued to the next page)

Supplementary Table 2. Continued

| Country [Reference(s)]                                                                 | Year(s) of survey | Method of gathering survey data              | Target population                                             | Range of study                                  | Number of respondents | Age of respondents (yr) | Sampling method                                 | Justified sample size | Response rate (%) | Ever trained in CPR (%) | Trained in CPR within previous 1 year (%) <sup>1</sup> | Trained in CPR within previous 2 years (%) <sup>1</sup> | Trained in CPR within previous 5 years (%) <sup>1</sup> | Trained in CPR over 5 years ago (%) <sup>1</sup> | Willing to be trained in CPR (%) |
|----------------------------------------------------------------------------------------|-------------------|----------------------------------------------|---------------------------------------------------------------|-------------------------------------------------|-----------------------|-------------------------|-------------------------------------------------|-----------------------|-------------------|-------------------------|--------------------------------------------------------|---------------------------------------------------------|---------------------------------------------------------|--------------------------------------------------|----------------------------------|
| Korea [Kang et al., 2006*]                                                             | -                 | Survey                                       | General public                                                | Metropolitan city (Incheon)                     | 5,114                 | Adults                  | -                                               | No                    | -                 | 4                       | -                                                      | -                                                       | -                                                       | -                                                | -                                |
| Malta [Caruana et al., 2013*]                                                          | -                 | Interview                                    | General public                                                | Country                                         | 656                   | -                       | Probability quota sample                        | No                    | -                 | 35                      | -                                                      | -                                                       | -                                                       | -                                                | -                                |
| New Zealand [Larsen et al., 2004]                                                      | 2002              | Telephone survey                             | General public                                                | Metropolitan city (Wellington)                  | 400                   | > 17                    | Systematic random sample                        | No                    | 76                | 74                      | 12                                                     | -                                                       | 37                                                      | 63                                               | -                                |
| Oman [AlShaqsí et al., 2015]                                                           | 2014              | Face-to-face interview (in public places)    | General public                                                | Five cities (Muscat, Sur, Ibri, Nizwa, Salalah) | 873                   | -                       | Non-probability sample (convenience sample)     | No                    | 58                | 39                      | 26                                                     | -                                                       | -                                                       | -                                                | -                                |
| Oman [Al-Riyami et al., 2019*]                                                         | -                 | Questionnaire completion (in public places)  | General public (excluding persons with medical background)    | Country                                         | 924                   | -                       | Non-probability sample (convenience sample)     | No                    | -                 | 21                      | -                                                      | -                                                       | -                                                       | -                                                | 833                              |
| Poland [Rasmus and Czekało, 2000]                                                      | 1997              | Questionnaire self-completion                | General public                                                | Country                                         | 1,092                 | -                       | Random sample (type unknown)                    | No                    | -                 | 73                      | -                                                      | -                                                       | -                                                       | -                                                | 823                              |
| Portugal [Díxe and Gomes, 2015]                                                        | 2010–2012         | Questionnaire self-completion (at workplace) | General public (employees of public and private institutions) | Country                                         | 1,700                 | ≥ 18                    | Non-probability sample (convenience sample)     | No                    | -                 | 18                      | -                                                      | -                                                       | -                                                       | -                                                | 963                              |
| Russia [Birkun and Kosova, 2018a; Birkun and Kosova, 2018b*; Birkun and Kosova, 2018c] | 2017–2018         | Face-to-face interview (in public places)    | General public                                                | Region (Crimean peninsula)                      | 384                   | ≥ 18                    | Purposive non-probability sample (quota sample) | Yes                   | 95                | 53                      | 24                                                     | -                                                       | 42                                                      | 54                                               | 523                              |
| Saudi Arabia [Qara et al., 2019]                                                       | 2018              | Questionnaire self-completion                | General public (excluding healthcare providers)               | Metropolitan city (Jeddah)                      | 600                   | ≥ 18                    | -                                               | No                    | -                 | 29                      | -                                                      | -                                                       | -                                                       | -                                                | -                                |
| Singapore [Quah et al., 2012*; Ong et al., 2013]                                       | 2009–2010         | Face-to-face interview (in-home)             | General public                                                | Country                                         | 4,192                 | 18–69                   | Simple random sample                            | No                    | 65                | 31                      | -                                                      | -                                                       | -                                                       | -                                                | -                                |

(continued to the next page)

Supplementary Table 2. Continued

| Country [Reference(s)]                                                 | Year(s) of survey | Method of gathering survey data               | Target population                                                    | Range of study                                                             | Number of respondents | Age of respondents (yr) | Sampling method                                    | Justified sample size | Response rate (%) | Ever trained in CPR (%) | Trained in CPR within previous 1 year (%) <sup>1</sup> | Trained in CPR within previous 2 years (%) <sup>1</sup> | Trained in CPR within previous 5 years (%) <sup>1</sup> | Trained in CPR over 5 years ago (%) <sup>1</sup> | Willing to be trained in CPR (%) |
|------------------------------------------------------------------------|-------------------|-----------------------------------------------|----------------------------------------------------------------------|----------------------------------------------------------------------------|-----------------------|-------------------------|----------------------------------------------------|-----------------------|-------------------|-------------------------|--------------------------------------------------------|---------------------------------------------------------|---------------------------------------------------------|--------------------------------------------------|----------------------------------|
| Slovenia [Rajapakse et al., 2010]                                      | 2006              | Telephone survey                              | General public (excluding persons with medical education background) | Country                                                                    | 500                   | ≥ 18                    | Simple random sample                               | Yes                   | 30                | 69                      | 2                                                      | 4                                                       | 12                                                      | 86                                               | -                                |
| Spain [Bailesteros-Peña et al., 2016]                                  | 2015              | Face-to-face interview (in public places)     | General public (excluding persons with healthcare education)         | Metropolitan cities of the Basque Country (Bilbao, San Sebastian, Vitoria) | 605                   | 15-64                   | Purposive non-probability sample (quota sample)    | Yes                   | -                 | 37                      | 29                                                     | 39                                                      | 59                                                      | 42                                               | 642                              |
| Spain [Rafecas Ventosa et al., 2017]                                   | 2016              | Questionnaire completion (in public places)   | General public                                                       | Metropolitan city (Barcelona)                                              | 3,067                 | ≥ 12                    | Non-probability sample (voluntary response sample) | No                    | -                 | 34                      | -                                                      | -                                                       | -                                                       | -                                                | -                                |
| Sweden [Axelsson et al., 2006]                                         | 2000              | Questionnaire self-completion (postal)        | General public                                                       | Country                                                                    | 3,167                 | 18-79                   | Stratified random sample                           | No                    | 63                | 45                      | -                                                      | -                                                       | -                                                       | -                                                | 502                              |
| Taiwan [Pei-Chuan Huang et al., 2019]                                  | 2013              | Telephone survey                              | General public                                                       | Country                                                                    | 1,073                 | ≥ 20                    | Stratified random sample                           | Yes                   | 32                | 41                      | 22                                                     | 35                                                      | 52                                                      | 47                                               | -                                |
| The UK, England [Donohoe et al., 2006]                                 | 2003              | Face-to-face interview (in-home)              | General public                                                       | County (Greater London)                                                    | 1,011                 | > 16                    | Purposive non-probability sample (quota sample)    | No                    | -                 | 30                      | 33                                                     | -                                                       | -                                                       | 16                                               | -                                |
| The UK, England [Brooks et al., 2015]                                  | 2014              | Face-to-face interview (in a shopping centre) | General public                                                       | City (Southampton)                                                         | 1,004                 | No limit                | Non-probability sample (convenience sample)        | No                    | -                 | 61                      | -                                                      | -                                                       | -                                                       | -                                                | -                                |
| The UK, Scotland [Dobbie et al., 2018]                                 | 2015              | Face-to-face interview (in-home)              | General public                                                       | Country (Scotland)                                                         | 1,027                 | ≥ 16                    | Purposive non-probability sample (quota sample)    | No                    | -                 | 52                      | -                                                      | -                                                       | -                                                       | -                                                | 422                              |
| The UK, whole [Hawkes et al., 2017 <sup>†</sup> ; Hawkes et al., 2019] | 2017              | Online survey                                 | General public (interested/registered to participate in surveys)     | Country                                                                    | 2,084                 | ≥ 18                    | Purposive non-probability sample (quota sample)    | No                    | -                 | 59                      | 17                                                     | -                                                       | 46                                                      | 54                                               | -                                |

(continued to the next page)

Supplementary Table 2. Continued

| Country [Reference(s)]                               | Year(s) of survey | Method of gathering survey data                      | Target population | Range of study                                                                                                                                        | Number of respondents | Age of respondents (yr) | Sampling method                             | Justified sample size | Response rate (%) | Ever trained in CPR (%) | Trained in CPR within previous 1 year (%) <sup>1</sup> | Trained in CPR within previous 2 years (%) <sup>1</sup> | Trained in CPR within previous 5 years (%) <sup>1</sup> | Trained in CPR over 5 years ago (%) <sup>1</sup> | Willing to be trained in CPR (%) |
|------------------------------------------------------|-------------------|------------------------------------------------------|-------------------|-------------------------------------------------------------------------------------------------------------------------------------------------------|-----------------------|-------------------------|---------------------------------------------|-----------------------|-------------------|-------------------------|--------------------------------------------------------|---------------------------------------------------------|---------------------------------------------------------|--------------------------------------------------|----------------------------------|
| The USA [Barnhart et al., 2005]                      | 2000              | Telephone survey                                     | General public    | Six counties in three states (Hartford County, Connecticut; Manhattan and Suffolk Counties, New York; Camden and Bergen/Passaic Counties, New Jersey) | 1,880                 | ≥ 18                    | Simple random sample                        | No                    | 50                | 42                      | -                                                      | -                                                       | -                                                       | -                                                | -                                |
| The USA [Coons and Guy, 2009]                        | 2008              | Questionnaire self-completion (postal)               | General public    | Two counties in one state (Maricopa County, Santa Cruz County, Arizona)                                                                               | 755                   | ≥ 18                    | Stratified random sample                    | Yes                   | 50                | 55 (rural), 63 (urban)  | -                                                      | -                                                       | -                                                       | -                                                | -                                |
| The USA [Sipsma et al., 2011]                        | 2008              | Telephone survey                                     | General public    | County (King County, Washington)                                                                                                                      | 1,001                 | ≥ 18                    | Stratified random sample                    | Yes                   | 39                | 79                      | 17                                                     | -                                                       | 46                                                      | 53                                               | -                                |
| The USA [Blewer et al., 2015*; Murray et al., 2016*] | 2014–2015         | Telephone survey                                     | General public    | Region in a state (Southeastern Pennsylvania)                                                                                                         | 10,048                | Adults                  | Stratified random sample                    | No                    | -                 | 65                      | -                                                      | -                                                       | -                                                       | -                                                | -                                |
| The USA [Blewer et al., 2017; Blewer, 2018*]         | 2015              | Telephone survey                                     | General public    | Country                                                                                                                                               | 9,022                 | ≥ 18                    | Stratified random sample                    | No                    | -                 | 65                      | -                                                      | 28                                                      | -                                                       | -                                                | -                                |
| The USA [Fratia et al., 2020]                        | 2015–2017         | Questionnaire self-completion (at public gatherings) | General public    | Metropolitan city (Baltimore, Maryland)                                                                                                               | 516                   | ≥ 14                    | Non-probability sample (convenience sample) | No                    | -                 | 68                      | -                                                      | -                                                       | -                                                       | -                                                | -                                |
| The USA [Petruncio et al., 2018]                     | 2016              | Face-to-face interview (in a shopping center)        | General public    | County (Charleston County, South Carolina)                                                                                                            | 318                   | ≥ 18                    | Non-probability sample (convenience sample) | No                    | -                 | 70                      | -                                                      | -                                                       | -                                                       | -                                                | -                                |
| The USA [Knapp et al., 2018*]                        | -                 | Survey (in public places)                            | General public    | City (Norfolk, Virginia)                                                                                                                              | 712                   | 18–89                   | Non-probability sample (convenience sample) | No                    | -                 | 72                      | -                                                      | -                                                       | -                                                       | -                                                | -                                |

CPR, cardiopulmonary resuscitation.

\*Conference abstracts, dissertation abstract [Blewer, 2018] and non-English articles (data from English-language abstracts and tables only); em dash — no data/unknown.

<sup>1</sup>Percentage out of respondents who were trained in CPR. <sup>2</sup>Percentage out of respondents who were not trained in CPR. <sup>3</sup>Percentage out of all respondents.
