# Supplementary material for: Global prevalence of cardiopulmonary resuscitation training among the general public: a scoping review
Source: PubMed Central journal article supplement — Clin Exp Emerg Med. 2021 Dec 31;8(4):255–67. doi: 10.15441/ceem.21.066 (PMC8743682; doi:10.15441/ceem.21.066), 2021-12-31
Supplement: ceem-21-066-suppl3.pdf [file ceem-21-066-suppl3.pdf]

**Supplementary Table 3.** Prevalence of CPR training (percentage of persons ever trained) by country, territorial level and year of survey

| Countries    | Year               |                     |      |      |                  |      |      |                  |      |      |      |                  |                     |      |      |      |      |      |                     | Range, %           |                     |                  |                  |                    |                     |                     |       |
|--------------|--------------------|---------------------|------|------|------------------|------|------|------------------|------|------|------|------------------|---------------------|------|------|------|------|------|---------------------|--------------------|---------------------|------------------|------------------|--------------------|---------------------|---------------------|-------|
|              | 1997               | 1998                | 1999 | 2000 | 2001             | 2002 | 2003 | 2004             | 2005 | 2006 | 2007 | 2008             | 2009                | 2010 | 2011 | 2012 | 2013 | 2014 | 2015                |                    | 2016                | 2017             | 2018             | 2019               | Unknown             |                     |       |
| Australia    | 54 <sup>4,16</sup> | 64 <sup>17,18</sup> |      |      | 52 <sup>19</sup> |      |      | 74 <sup>20</sup> |      |      |      |                  |                     |      |      |      |      |      |                     |                    | 68 <sup>21,22</sup> | 56 <sup>23</sup> |                  |                    |                     | 52-74               |       |
| Belgium      |                    |                     |      |      |                  |      |      |                  |      |      |      |                  |                     |      |      |      |      |      |                     |                    |                     |                  |                  |                    | 30 <sup>24</sup>    | 30                  |       |
| Brazil       |                    |                     |      |      |                  |      |      |                  |      |      |      |                  |                     |      |      |      |      |      |                     |                    |                     |                  | 3 <sup>25*</sup> | 16 <sup>25,*</sup> |                     |                     | 3-16  |
| Canada       |                    |                     |      |      |                  |      |      |                  |      |      |      |                  |                     |      |      |      |      |      |                     |                    |                     |                  |                  |                    | 64 <sup>26</sup>    | 64                  |       |
| China        |                    |                     |      |      | 12 <sup>27</sup> |      |      |                  |      |      |      |                  | 21 <sup>28,29</sup> |      |      |      |      |      | 26 <sup>6</sup>     | 15 <sup>11,†</sup> |                     |                  |                  | 38 <sup>30</sup>   | 12 <sup>31</sup>    | 12-38               |       |
| Costa Rica   |                    |                     |      |      |                  |      |      |                  |      |      |      |                  |                     |      |      |      |      |      |                     | 26 <sup>11,†</sup> |                     |                  |                  |                    | 23 <sup>32</sup>    |                     |       |
| Ghana        |                    |                     |      |      |                  |      |      |                  |      |      |      |                  |                     |      |      |      |      |      | 36 <sup>33,34</sup> |                    |                     |                  |                  |                    |                     | 36                  |       |
| Greece       |                    |                     |      |      |                  |      |      |                  |      |      |      |                  |                     |      |      |      |      |      |                     |                    |                     |                  |                  | 31 <sup>35</sup>   |                     | 31                  |       |
| Iceland      |                    |                     |      |      |                  |      |      |                  |      |      |      |                  |                     |      |      |      |      |      |                     |                    |                     |                  |                  |                    | 29 <sup>36</sup>    | 29                  |       |
| India        |                    |                     |      |      |                  |      |      |                  |      |      |      |                  |                     |      |      |      |      |      |                     |                    |                     |                  |                  |                    | 73 <sup>37</sup>    | 73                  |       |
| Indonesia    |                    |                     |      |      |                  |      |      |                  |      |      |      |                  |                     |      |      |      |      |      |                     |                    |                     |                  |                  |                    |                     | 3                   |       |
| Ireland      |                    |                     |      |      |                  |      |      |                  |      |      |      | 28 <sup>39</sup> |                     |      |      |      |      |      |                     |                    |                     |                  |                  |                    |                     | 40                  |       |
| Japan        |                    |                     |      |      |                  |      |      |                  |      |      |      |                  |                     |      |      |      |      |      |                     |                    |                     |                  |                  |                    |                     | 28                  |       |
| South Korea  |                    |                     |      |      |                  |      |      |                  |      |      |      |                  |                     |      |      |      |      |      |                     |                    |                     |                  |                  |                    | 49 <sup>41,42</sup> | 49 <sup>43</sup>    | 35-49 |
| Malta        |                    |                     |      |      |                  |      |      |                  |      |      |      |                  |                     |      |      |      |      |      |                     |                    |                     |                  |                  |                    |                     | 4 <sup>46</sup>     | 4-55  |
| New Zealand  |                    |                     |      |      |                  |      |      |                  |      |      |      |                  |                     |      |      |      |      |      |                     |                    |                     |                  |                  |                    |                     | 35 <sup>50</sup>    | 35    |
| Oman         |                    |                     |      |      |                  |      |      |                  |      |      |      |                  |                     |      |      |      |      |      |                     |                    |                     |                  |                  |                    |                     | 74                  |       |
| Poland       |                    |                     |      |      |                  |      |      |                  |      |      |      |                  |                     |      |      |      |      |      |                     |                    |                     |                  |                  |                    |                     | 21 <sup>53</sup>    | 21-39 |
| Portugal     |                    |                     |      |      |                  |      |      |                  |      |      |      |                  |                     |      |      |      |      |      |                     |                    |                     |                  |                  |                    |                     | 73                  |       |
| Russia       |                    |                     |      |      |                  |      |      |                  |      |      |      |                  |                     |      |      |      |      |      |                     |                    |                     |                  |                  |                    |                     | 18                  |       |
| Saudi Arabia |                    |                     |      |      |                  |      |      |                  |      |      |      |                  |                     |      |      |      |      |      |                     |                    |                     |                  |                  |                    |                     | 53 <sup>56-58</sup> | 53    |
| Singapore    |                    |                     |      |      |                  |      |      |                  |      |      |      |                  |                     |      |      |      |      |      |                     |                    |                     |                  |                  |                    |                     | 29                  |       |
| Slovenia     |                    |                     |      |      |                  |      |      |                  |      |      |      |                  |                     |      |      |      |      |      |                     |                    |                     |                  |                  |                    |                     | 31                  |       |
| Spain        |                    |                     |      |      |                  |      |      |                  |      |      |      |                  |                     |      |      |      |      |      |                     |                    |                     |                  |                  |                    |                     | 69                  |       |
| Sweden       |                    |                     |      |      |                  |      |      |                  |      |      |      |                  |                     |      |      |      |      |      |                     |                    |                     |                  |                  |                    |                     | 34-37               |       |
| Taiwan       |                    |                     |      |      |                  |      |      |                  |      |      |      |                  |                     |      |      |      |      |      |                     |                    |                     |                  |                  |                    |                     | 45                  |       |
| Turkey       |                    |                     |      |      |                  |      |      |                  |      |      |      |                  |                     |      |      |      |      |      |                     |                    |                     |                  |                  |                    |                     | 41                  |       |
| UK           |                    |                     |      |      |                  |      |      |                  |      |      |      |                  |                     |      |      |      |      |      |                     |                    |                     |                  |                  |                    |                     | 40 <sup>66</sup>    | 40    |
| USA          |                    |                     |      |      |                  |      |      |                  |      |      |      |                  |                     |      |      |      |      |      |                     |                    |                     |                  |                  |                    |                     | 30-61               |       |

Territorial levels of the surveys are encoded with color: national, light-green; constituent unit(s)/state(s)/region(s), light-blue; municipality(ies)/county(ies), pink; metropolitan city(ies)/city(ies), yellow. Superscript numbers are reference numbers.

CPR, cardiopulmonary resuscitation.

\*The rates reported by the same study separately for three municipalities. †The rates reported by the same study separately for two metropolitan cities. ‡The nation-wide study for the population of Scotland. §The rates reported by the same study separately for rural (55%) and urban (63%) populations.
